# Supplementary material for: Untargeted GC-MS-Based Metabolomics for Early Detection of Colorectal Cancer
Source: PubMed Central journal article supplement (PMC8599589; doi:10.3389/fonc.2021.729512), 2021-11-04
Supplement: Image_1.pdf [file Image_1.pdf]

*Supplementary Material*

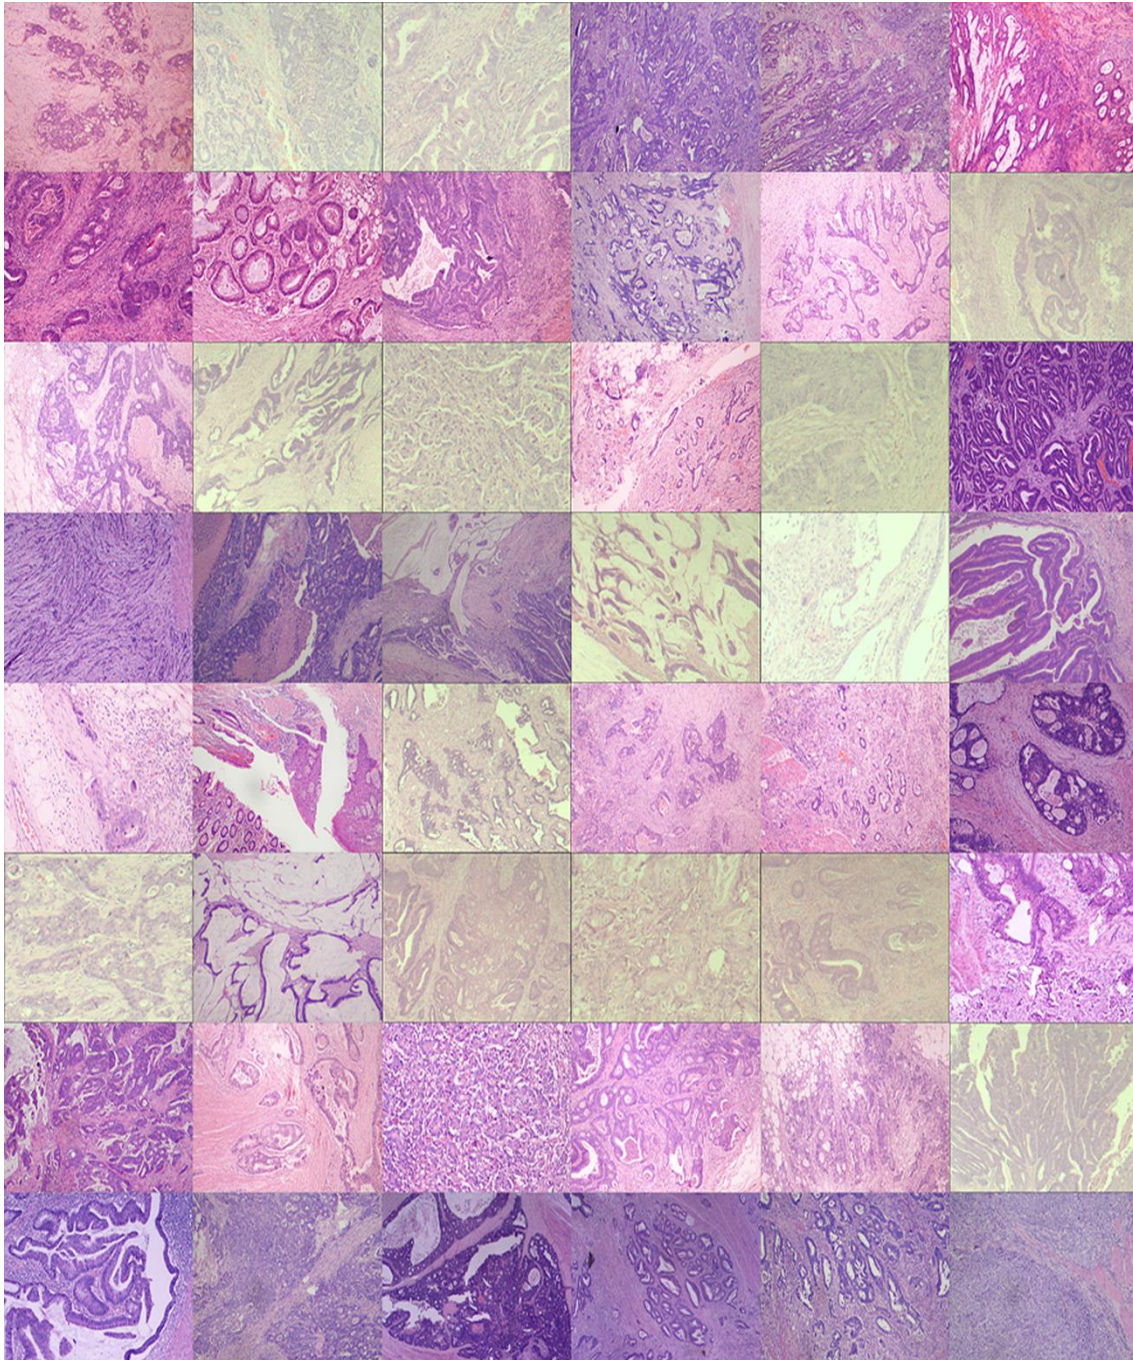

Figure S1 Histopathological section photographs of CRC patients for H&E analysis (100× magnification). (Place in the order of Table S1 from left to right)

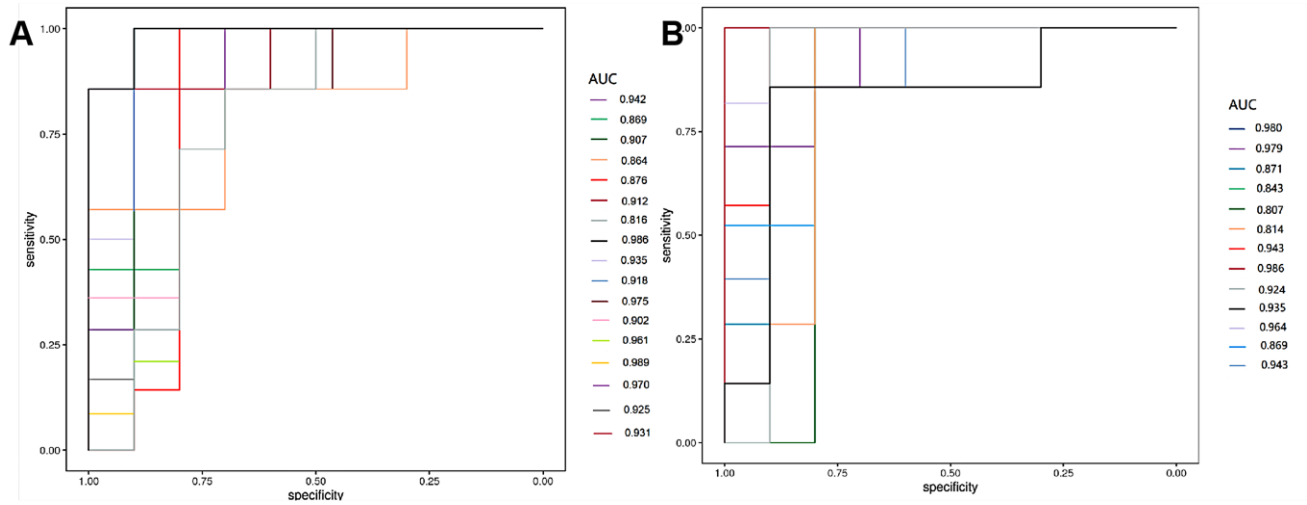

Figure S2 The ROC curve of potential biomarkers among the tissue (A) and serum (B).
